# Supplementary material
Source: publisher figshare collection journal article supplement (https://sage.figshare.com/ndownloader/files/15130280)
Supplement: Supplementary file 1 [file 15130280]

Reviewer 1 v2

The authors have addressed all my comments and in my opinion, the manuscript is now acceptable for publication.
